# Supplementary material
Source: PubMed Central journal article supplement (PMC3594682)
Supplement: bph0168-1266-SD1.pdf [file bph0168-1266-SD1.pdf]

## **Supplementary Information**

### **DETERMINANTS INVOLVED IN SUBTYPE-SPECIFIC FUNCTIONS OF RAT TRACE AMINE-ASSOCIATED RECEPTORS 1 AND 4**

**Claudia Stäubert, Jens Bohnkamp, Torsten Schöneberg<sup>#</sup>**

Institute of Biochemistry, Medical Faculty, University Leipzig, 04103 Leipzig, Germany

Running title: Determinants defining Taar-specific function

<sup>#</sup>To whom correspondence should be addressed: Torsten Schöneberg, Institute of Biochemistry, Molecular Biochemistry, Medical Faculty, University of Leipzig, Johannisallee 30, 04103 Leipzig, Germany, Phone: +49-341-9722-151, Fax: +49-341-9722-159, E-mail: [schoberg@medizin.uni-leipzig.de](mailto:schoberg@medizin.uni-leipzig.de)

### rat TA<sub>1</sub>

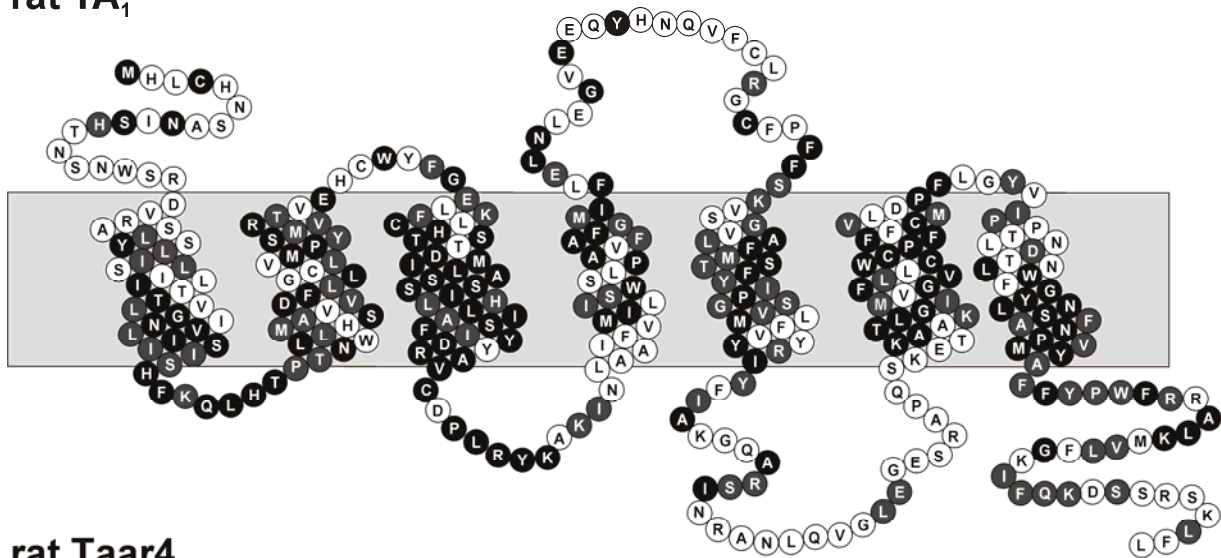

### rat Taar4

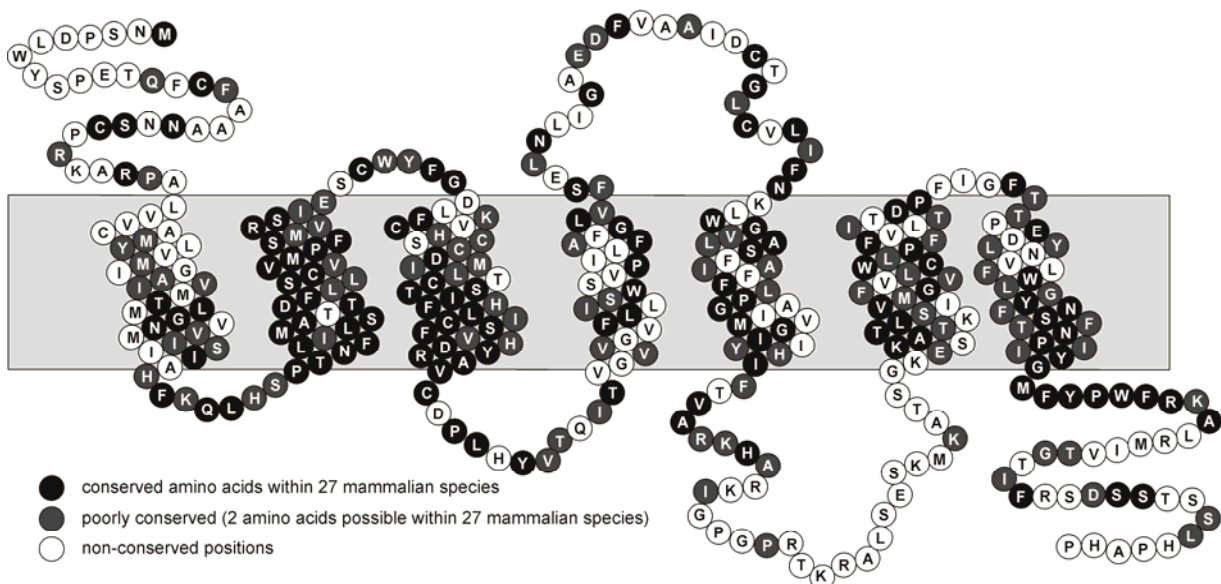

**Figure S1. Structural conservation of rat TA<sub>1</sub> and rat Taar4.** Amino acid sequences of rat TA<sub>1</sub> and rat Taar4 are shown. Positions conserved in 27 mammalian species (*Bos taurus*, *Choloepus hoffmanni*, *Cavia porcellus*, *Dasypus novemcinctus*, *Dipodomys ordii*, *Equus caballus*, *Erinaceus europaeus*, *Echinops telfairi*, *Felis catus*, *Loxodonta africana*, *Monodelphis domestica*, *Macropus eugenii*, *Myotis lucifugus*, *Macaca mulatta*, *Microcebus murinus*, *Mus musculus*, *Ornithorhynchus anatinus*, *Oryctolagus cuniculus*, *Papio hamadryas*, *Pongo pygmaeus*, *Pteropus vampyrus*, *Rattus norvegicus*, *Sorex araneus*, *Saguinus oedipus*, *Saimiri sciureus*, *Sus scrofa*, *Tupaia belangeri*) are depicted in black. Positions that vary only by two amino acids are shown in gray. Positions given in white are not preserved during evolution. With 83.0% identity Taar4 is slightly higher conserved than TA<sub>1</sub> (80.7%).

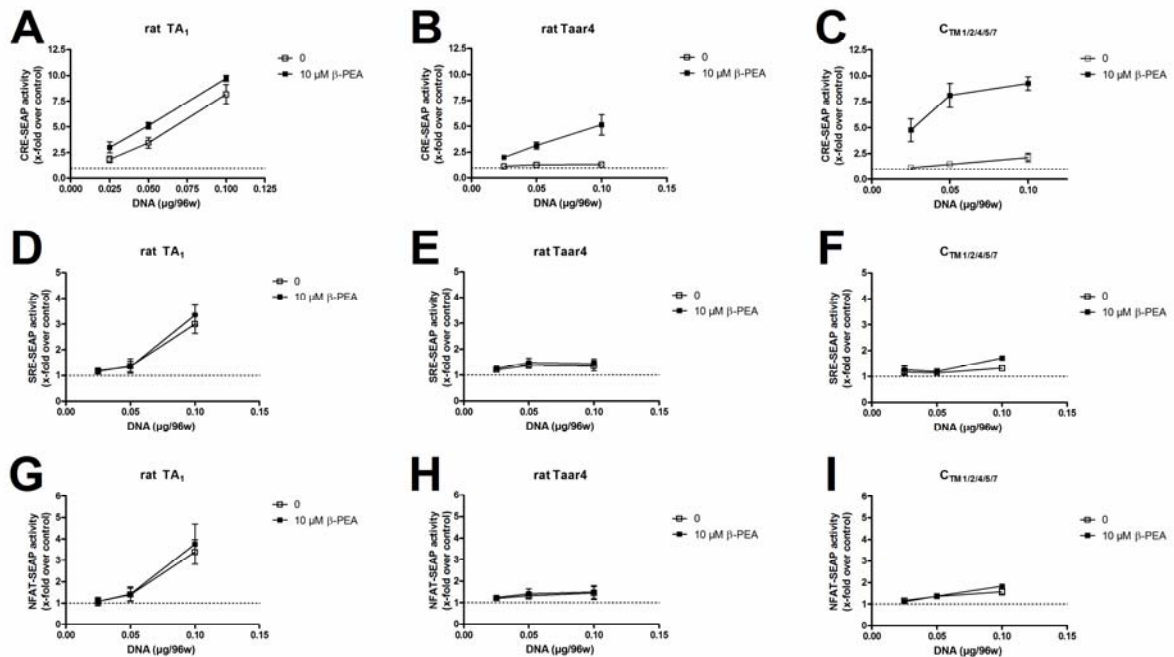

**Figure S2. Functional characterization of rat TA<sub>1</sub>, rat Taar4 and C<sub>TMI1/2/4/5/7</sub> in SEAP reporter gene assays.** Correlation of basal or stimulated receptor activity and the amount of transfected plasmid DNA. HEK-293 cells were transfected with 25 ng, 50 ng or 100 ng of the indicated plasmid DNA per well in 96-well plate. The total amount of transfected plasmid DNA was constant since differences were compensated by addition of respective amount empty vector. A-C: CRE-SEAP reporter gene assay in presence or absence of β-PEA D-F: SRE-SEAP reporter gene assay. G-I: NFAT-SEAP reporter gene assay. SEAP activity is expressed as fold over basal levels of HEK293 cells transfected with empty vector pDps. Data are presented as mean ± SEM of two to four independent experiments, each carried out in triplicate.

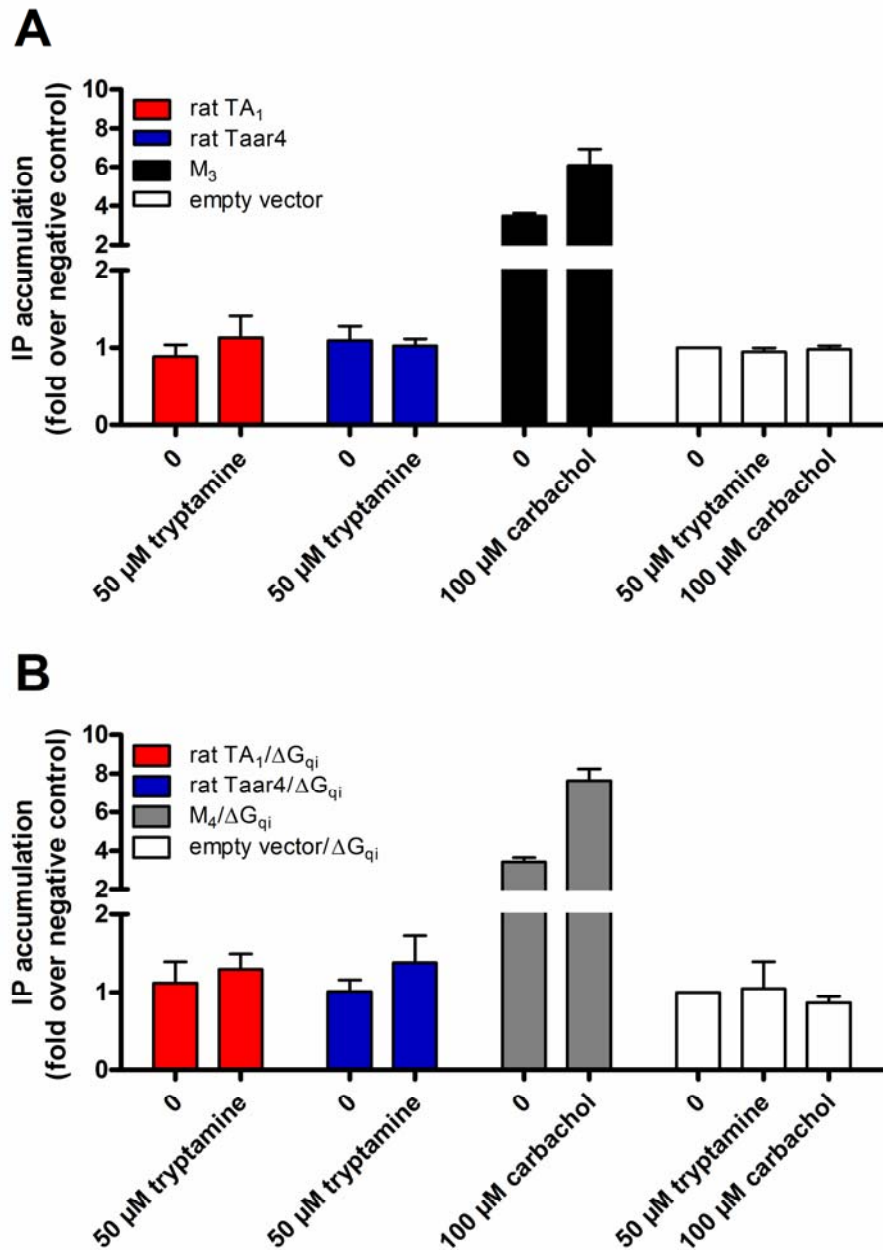

**Figure S3. Functional characterization of rat TA<sub>1</sub> and rat Taar4 in inositol phosphate (IP) assays.** A: IP accumulation in presence and absence of agonist. M<sub>3</sub> muscarinic acetylcholine receptor (NCBI Reference Sequence: NM\_000740.2) served as positive control. B: G $\alpha_{\Delta 6qi4myr}$  (abbreviated  $\Delta G_{qi}$ ) turns the G $\alpha_i$ -coupled signal into the G $\alpha_q$  pathway (phospholipase C activation measured as PI-turnover). M<sub>4</sub> muscarinic acetylcholine receptor (NCBI Reference Sequence: NM\_000741.2) served as positive control.

**Table S1. Primers used for rat Taar1 and rat Taar4 amplification and generation of chimeras.**

| <b>ID</b> | <b>Sequence 5' -&gt; 3'</b>                                                                           | <b>Purpose</b>                           |
|-----------|-------------------------------------------------------------------------------------------------------|------------------------------------------|
| OLIGO.A   | GTGCAAATCAAAGAACTGCTCCTC                                                                              | pcDps forward (amplification/sequencing) |
| OLIGO.B   | CCTGGTTCTTTCCGCCTCAGAAG                                                                               | pcDps reverse (amplification/sequencing) |
| OLIGO.12  | ATTTTAGCACAATGTCCAGCTCCAA                                                                             | rat Taar1 amplification S                |
| OLIGO.13  | TAAAAGCCCATGAAATCAGTGCCTA                                                                             | rat Taar1 amplification AS               |
| OLIGO.9   | CATCGTCCTTATAGTCCAAAAATAGC<br>TTAGACC                                                                 | rat Taar1 FLAG adaptor AS                |
| OLIGO.10  | CCCGACTACGCCCATCTTTGCCACAAT<br>AG                                                                     | rat Taar1 HA adaptor S                   |
| OLIGO.c   | TTTGGGGAAAACAAGTTCCTGGT                                                                               | rat Taar4 amplification S                |
| OLIGO.d   | TCTGTGAGGTCAGCACTCATGC                                                                                | rat Taar4 amplification AS               |
| OLIGO.e   | CATCGTCCTTATAGTCAGGATGTGCA<br>GGATGC                                                                  | rat Taar4 FLAG-adaptor AS                |
| OLIGO.f   | CCCGACTACGCCAATTCACCTGACCT<br>CT                                                                      | rat Taar4 HA-adaptor S                   |
| OLIGO.0   | CGCGAATCCCCACCATGTACCCCTA<br>CGACGTCCT                                                                | HA uni EcoRI+Coseq S                     |
| OLIGO.1   | CGCCGCACTAGTTCACTTATCGTCATC<br>GTCCTTAT                                                               | FLAG uni SpeI AS                         |
| OLIGO.114 | CCCAAACCTTCTACGTGCCTTTCTCCAA<br>CAAGACGGGCGTGGTGCGCCATCTTT<br>GCCACAATAGCGCGAAT                       | rat Taar1 HA-Rhodopsin adaptor S         |
| OLIGO.115 | CCCAAACCTTCTACGTGCCTTTCTCCAA<br>CAAGACGGGCGTGGTGCGCAATTCAC<br>CTGACCTCTGGTACTCC                       | rat Taar4 HA-Rhodopsin adaptor S         |
| OLIGO.113 | CTCGAATCCCCACCATGTACCCCTAC<br>GACGTCCCCGACTACGCCAACGGGAC<br>CGAGGGCCCCAAACTTCTACGTGCCTT<br>TC         | HA-Rhod-uni S                            |
| OLIGO.70  | CGTGTGAAGTTGCTTGAAGTGGGCAA<br>TG                                                                      | TMD1-rat Taar4 AS                        |
| OLIGO.71  | CATTGCCCACTTCAAGCAACTTCACA<br>C                                                                       | TMD2-rat Taar1 S                         |
| OLIGO.72  | GGAAGACATTATACAAATCTTCAGGG<br>ATAACATAGCCCAGGAAA                                                      | TMD6-rat Taar1 AS                        |
| OLIGO.73  | CCTTTCCTGGGCTATGTTATCCCTGAA<br>GATTTGTATAATGTCTTCCTC                                                  | TMD7-rat Taar4 S                         |
| OLIGO.74  | CCGCCACTATGCTGTCTGTGACCCTTT<br>AAGATACAAAGCCAAGA                                                      | TMD4-rat Taar1 S                         |
| OLIGO.75  | TCTTGGCTTTGTATCTTAAAGGGTCAC<br>AGACAGCATAGTGGCGG                                                      | TMD3-rat Taar4 AS                        |
| OLIGO.76  | AGTGGGTCACAGACAGCATAGTAGCG<br>GTCAATGG                                                                | TMD3-rat Taar1 AS                        |
| OLIGO.77  | CCATTGACCGCTACTATGCTGTCTGTG<br>ACCCACT                                                                | TMD4-rat Taar4 S                         |
| OLIGO.78  | GGAGCTGCTTGAAGTGGGATATCGAA<br>AT                                                                      | TMD1-rat Taar1 AS                        |
| OLIGO.79  | AGTTCCCCAAAGTACCAGCACGACTC<br>GATAGACCGGACCATACTGAAGGGCA<br>TGACCACGCAGCTCAACAGGAAGTCT<br>GTGGTAGCCAT | TMD2-rat Taar4 AS                        |

|           |                                                                                                                                |                                         |
|-----------|--------------------------------------------------------------------------------------------------------------------------------|-----------------------------------------|
| OLIGO.80  | TCGATATCCCCTTCAAGCAGCTCCA<br>CTCCCCGACCAACTTCCTTATTCTCTC<br>CATGGCTACCACAGACTTCCTGTT                                           | TMD2-rat Taar4 S                        |
| OLIGO.81  | CTATCGAGTCGTGCTGGTACTTTGGG<br>GAACT                                                                                            | TMD3-rat Taar1 S                        |
| OLIGO.82  | AGGTCTCCGAAGTACCAGCAGTGCTC<br>AACTG                                                                                            | TMD2-rat Taar1 AS                       |
| OLIGO.83  | AGGGTCGCACACAGCATAGTGGCGGT<br>CCACTGAGATGAAACAGAGGTGGAA<br>AATGGAGGTGGTACAGAGCATGATGT<br>CACAGCA                               | TMD3-rat Taar4 AS                       |
| OLIGO.84  | CAGTTGAGCACTGCTGGTACTTCGGA<br>GACCTCTTTTGCAAAGTCCACAGCTG<br>CTGTGACATCATGCTCTG                                                 | TMD3-rat Taar4 S                        |
| OLIGO.85  | CGACGCCGACGGTGATCTTGGCTTTG<br>TATCTTAAAGG                                                                                      | TMD3-rat Taar1 AS                       |
| OLIGO.86  | CCTGATTGTGATACTGCTCCTCAGCAC<br>CAATCAAATTTAATTCTGAGAACACC<br>AGGCCAAAGGCAAACAGGATGGG                                           | TMD4-rat Taar4 AS                       |
| OLIGO.87  | CCTTTAAGATACAAAGCCAAGATCAC<br>CGTCGGCGTCGTGGGGGTCTTTCTACT<br>CATCAGTTGGTCTGTCCCCATCCTGTT<br>TGCCTTTG                           | TMD4-rat Taar4 S                        |
| OLIGO.88  | ATTAAATTTGATTGGTGCTGAGGAGC<br>AGTATCACAAATCAGG                                                                                 | TMD5-rat Taar1 S                        |
| OLIGO.89  | ATATCAACACACACAAACCTGTACAG<br>ACCTGATTGTGATACTGCTCCT                                                                           | TMD4-rat Taar1 AS                       |
| OLIGO.90  | GACCTCGCTTGTCTTTAGCAACTGTG<br>AAAATGTGTATATAAATCCCCACCAT<br>GATTGCCCCAGGCAGAAAGAAAGCTA<br>TAAAGGAAGCCAGC                       | TMD5-rat Taar4 AS                       |
| OLIGO.91  | AGGAGCAGTATCACAATCAGGTCTGT<br>ACAGGTTTGTGTGTGTTGATATTTAAC<br>AAGCTCTGGGGAGTGCTGGCTTCCTTT<br>ATAGCTTTCT                         | TMD5-rat Taar4 S                        |
| OLIGO.92  | GGATTTATATACACATTTTCACAGTTG<br>CTAAAGGACAAGCGAGGTC                                                                             | TMD6-rat Taar1 S                        |
| OLIGO.93  | CGGATGTGGCCTTCATTTCCCCTTCCA<br>ATCCAACCT                                                                                       | TMD5-rat Taar1 AS                       |
| OLIGO.94  | AGTTGGATTGGAAGGGGAAATGAAG<br>GCCACATCCGAAAGGAAAGCAAGG<br>CCACCAAGACTTTGAGCATAGTCATG<br>GGAGT                                   | TMD6-rat Taar4 AS                       |
| OLIGO.95  | GGCCCTCTCAGAAAGCAAAGCAGAG<br>CGCCACAAAGCAAGGAAACAAAAGC<br>CGCGAAAACCTTAGGGATCATGGTG<br>CATGGTCCTGGACCCTTTCATTGGTTT<br>TACAACCC | TMD6-rat Taar4 S                        |
| OLIGO.96  |                                                                                                                                | TMD7-rat Taar1 S                        |
| OLIGO.109 | CACAGCACAAATACTCCCATGAC                                                                                                        | TMD6-intra-ratTaar4/extra-rat Taar1 AS  |
| OLIGO.110 | GTCATGGGAGTATTTGTGCTGTGCTG<br>GTGCCCGTTCTTTTCTGCA                                                                              | TMD6-intra-rat Taar4/extra-rat Taar1 S  |
| OLIGO.111 | AGAAGGGCAGCCAACACAGGAGGAA<br>AACGCCACCA                                                                                        | TMD6-intra-rat Taar1/extra-rat Taar4 AS |
| OLIGO.112 | CTGTGTTGGCTGCCCTTCT                                                                                                            | TMD6-intra-rat Taar1/extra-rat Taar4 S  |
| OLIGO.116 | TGGAGCTGCTTGAAGTGGGATATCGA                                                                                                     | TMD1 rat Taar1 AS                       |

|           |                                                |                   |
|-----------|------------------------------------------------|-------------------|
|           | AATGA                                          |                   |
| OLIGO.117 | TTCGATATCCCACTTCAAGCAGCTCCA                    | TMD2 rat Taar4 S  |
| OLIGO.118 | ATTCAGTGTGTCATTCAGAGTGGGTG<br>GGGTTGTAAAACCAAT | TMD6 rat Taar4 AS |
| OLIGO.119 | TTGGTTTTACAACCCCACTCTGA<br>ATGACACACTGAAT      | TMD7 rat Taar1 S  |

**Table S2. NCBI database accession numbers and sequence description**

|                                                                                      |                           | <b>TA<sub>1</sub></b><br><b>length</b> | <b>source</b>                                                                   | <b>Taar4</b><br><b>length</b> | <b>source</b>                                                                    |
|--------------------------------------------------------------------------------------|---------------------------|----------------------------------------|---------------------------------------------------------------------------------|-------------------------------|----------------------------------------------------------------------------------|
| <b><i>Mammalia</i></b><br><b><i>Protheria</i></b><br><i>Ornithorhynchus anatinus</i> | platypus                  | full length                            | NCBI <i>Ornithorhynchus anatinus</i> trace archive: gnl ti 649529709 and others | full length                   | NCBI <i>Ornithorhynchus anatinus</i> trace archive: gnl ti 1246961726 and others |
| <b><i>Metatheria</i></b><br><i>Monodelphis domestica</i>                             | gray short-tailed opossum | full length                            | NCBI <i>Monodelphis domestica</i> trace archive: gnl ti 337177360 and others    | full length<br>3x             | NCBI <i>Monodelphis domestica</i> trace archive: gnl ti 473024684 and others     |
| <i>Macropus eugenii</i>                                                              | tammar wallaby            | full length                            | NCBI <i>Macropus eugenii</i> trace archive: gnl ti  1649014544 and others       | full length                   | NCBI <i>Macropus eugenii</i> trace archive: gnl ti 1275406430 and others         |
| <b><i>Eutheria</i></b><br><b><i>Afrotheria</i></b><br><i>Procavia capensis</i>       | cape rock hyrax           | full length<br>(P)                     | NCBI <i>Procavia capensis</i> trace archive: gnl ti  1303042942 and others      | full length<br>3x             | NCBI <i>Procavia capensis</i> trace archive: gnl ti 1203477241 and others        |
| <i>Loxodonta africana</i>                                                            | African savanna elephant  | full length                            | NCBI <i>Loxodonta africana</i> trace archive: gnl ti 537131216 and others       | full length<br>2x             | NCBI <i>Loxodonta africana</i> trace archive: gnl ti 1695377756 and others       |
| <i>Echinops telfairi</i>                                                             | lesser hedgehog tenrec    | full length<br>2x (1P)                 | NCBI <i>Echinops telfairi</i> trace archive: gnl ti  691100554 and others       | full length<br>2x (1P)        | NCBI <i>Echinops telfairi</i> trace archive: gnl ti 688316620 and others         |
| <b><i>Xenarthra</i></b>                                                              |                           |                                        |                                                                                 |                               |                                                                                  |



|                               |                               |                     |                                                                              |                        |                                                                              |
|-------------------------------|-------------------------------|---------------------|------------------------------------------------------------------------------|------------------------|------------------------------------------------------------------------------|
| <i>Dasyopus novemcinctus</i>  | nine-banded Armadillo         | full length         | NCBI <i>Dasyopus novemcinctus</i> trace archive: gnl ti 566803806 and others | full length            | NCBI <i>Dasyopus novemcinctus</i> trace archive: gnl ti 567276505 and others |
| <i>Choloepus hoffmanni</i>    | Hoffmann's two-fingered sloth | full length         | NCBI <i>Choloepus hoffmanni</i> trace archive: gnl ti 1302995278 and others  | full length            | NCBI <i>Choloepus hoffmanni</i> trace archive: gnl ti 1357779584 and others  |
| -----                         |                               |                     |                                                                              |                        |                                                                              |
| <b><i>Laurasiatheria</i></b>  |                               |                     |                                                                              |                        |                                                                              |
| <b><i>Insectivora</i></b>     |                               |                     |                                                                              |                        |                                                                              |
| <i>Erinaceus europaeus</i>    | western European hedgehog     | full length         | NCBI <i>Erinaceus europaeus</i> trace archive: gnl ti 909479654 and others   | full length<br>2x (1P) | NCBI <i>Erinaceus europaeus</i> trace archive: gnl ti 932971697 and others   |
| <i>Sorex araneus</i>          | European shrew                | full length         | NCBI <i>Sorex araneus</i> trace archive: gnl ti 877297697 and others         | full length<br>2x (1P) | NCBI <i>Sorex araneus</i> trace archive: gnl ti 893813953 and others         |
| <b><i>Chiroptera</i></b>      |                               |                     |                                                                              |                        |                                                                              |
| <i>Pteropus vampyrus</i>      | large flying fox              | full length         | NCBI <i>Pteropus vampyrus</i> trace archive: gnl ti 1320431729 and others    | full length            | NCBI <i>Pteropus vampyrus</i> trace archive: gnl ti 1329134482 and others    |
| <i>Myotis lucifugus</i>       | little brown bat              | full length<br>(2x) | NCBI <i>Myotis lucifugus</i> trace archive: gnl ti 1874379801 and others     | full length            | NCBI <i>Myotis lucifugus</i> trace archive: gnl ti 1899487221 and others     |
| <b><i>Cetartiodactyla</i></b> |                               |                     |                                                                              |                        |                                                                              |
| <i>Bos taurus</i>             | cattle                        | full length         | NCBI <i>Bos taurus</i> trace archive: gnl ti 393291934 and others            | full length            | NCBI <i>Bos taurus</i> trace archive: gnl ti 620739238 and others            |
| <i>Sus scrofa</i>             | boar                          | full length<br>(2x) | NCBI <i>Sus scrofa</i> trace archive: gnl ti 2042809629 and others           | full length            | NCBI <i>Sus scrofa</i> trace archive: gnl ti 1579919251 and others           |
| <b><i>Perissodactyla</i></b>  |                               |                     |                                                                              |                        |                                                                              |
| <i>Equus caballus</i>         | horse                         | full length         | NCBI <i>Equus caballus</i> trace archive: gnl ti 1400434870 and others       | full length            | NCBI <i>Equus caballus</i> trace archive: gnl ti 1234728610 and others       |
| <b><i>Carnivora</i></b>       |                               |                     |                                                                              |                        |                                                                              |
| <i>Feliformia</i>             |                               |                     |                                                                              |                        |                                                                              |

|                              |                        |                    |                                                                                  |                   |                                                                                 |
|------------------------------|------------------------|--------------------|----------------------------------------------------------------------------------|-------------------|---------------------------------------------------------------------------------|
| <i>Felis catus</i>           | cat                    | full length        | NCBI <i>Felis catus</i> trace archive:<br>gnl ti 711855444 and others            | full length       | NCBI <i>Felis catus</i> trace archive:<br>gnl ti 965531899 and others           |
| <b>Canidae</b>               |                        |                    |                                                                                  |                   |                                                                                 |
| <i>Canis familiaris</i>      | dog                    | full length<br>(P) | NCBI <i>Canis familiaris</i> trace archive:<br>gnl ti 313292271 and others       | full length       | NCBI <i>Canis familiaris</i> trace archive:<br>gnl ti 302723376 and others      |
| <b>Euarchontoglires</b>      |                        |                    |                                                                                  |                   |                                                                                 |
| <b>Scandentia</b>            |                        |                    |                                                                                  |                   |                                                                                 |
| <i>Tupaia belangeri</i>      | northern tree shrew    | full length        | NCBI <i>Tupaia belangeri</i> trace archive:<br>gnl ti 1044829742 and others      | full length<br>2x | NCBI <i>Tupaia belangeri</i> trace archive:<br>gnl ti 1046628937 and others     |
| <b>Glires</b>                |                        |                    |                                                                                  |                   |                                                                                 |
| <b>Lagomorpha</b>            |                        |                    |                                                                                  |                   |                                                                                 |
| <b>Leporidae</b>             |                        |                    |                                                                                  |                   |                                                                                 |
| <i>Oryctolagus cuniculus</i> | european rabbit        | full length        | NCBI <i>Oryctolagus cuniculus</i> trace<br>archive: gnl ti 1940715560 and others | full length       | NCBI <i>Oryctolagus cuniculus</i> trace archive:<br>gnl ti 638702844 and others |
| <b>Rodentia</b>              |                        |                    |                                                                                  |                   |                                                                                 |
| <i>Cavia porcellus</i>       | domestic guinea<br>pig | full length        | NCBI <i>Cavia porcellus</i> trace archive:<br>gnl ti 1617005707 and others       | full length<br>2x | NCBI <i>Cavia porcellus</i> trace archive:<br>gnl ti 1596694171 and others      |
| <i>Dipodomys ordii</i>       | Ord's kangaroo rat     | full length        | NCBI <i>Dipodomys ordii</i> trace archive:<br>gnl ti 1535262597 and others       | full length       | NCBI <i>Dipodomys ordii</i> trace archive:<br>gnl ti 1586901258 and others      |
| <i>Mus musculus</i>          | house mouse            | full length        | NCBI accession: NM_053205                                                        | full length       | NCBI accession: FJ372497, NM_001008499                                          |
| <i>Rattus norvegicus</i>     | Norway rat             | full length        | NCBI accession: NM_134328                                                        | full length       | NCBI accession: FJ372521, NM_175583                                             |
| <b>Primates</b>              |                        |                    |                                                                                  |                   |                                                                                 |
| <i>Strepsirrhini</i>         |                        |                    |                                                                                  |                   |                                                                                 |

|                                                                       |                           |             |                                                                                |                    |                                                                                |
|-----------------------------------------------------------------------|---------------------------|-------------|--------------------------------------------------------------------------------|--------------------|--------------------------------------------------------------------------------|
| <i>Lemuriformes</i><br><i>Microcebus murinus</i>                      | gray mouse lemur          | full length | NCBI <i>Microcebus murinus</i> trace archive:<br>gnl ti 1576501568 and others  | full length        | NCBI <i>Microcebus murinus</i> trace archive:<br>gnl ti 1563038889 and others  |
| <i>Haplorrhini</i>                                                    |                           |             |                                                                                |                    |                                                                                |
| <i>Simiiformes</i><br><i>Platyrrhini</i>                              |                           |             |                                                                                |                    |                                                                                |
| <i>Cebidae</i><br><i>Callithrix jacchus</i>                           | common marmoset           | full length | NCBI <i>Callithrix jacchus</i> trace archive:<br>gnl ti 974234240 and others   | full length<br>(P) | NCBI <i>Callithrix jacchus</i> trace archive:<br>gnl ti 1133228298 and others  |
| <i>Saguinus oedipus</i>                                               | cotton-top tamarin        | full length | NCBI accession: GQ892034                                                       | full length        | NCBI accession: GQ892037                                                       |
| <i>Saimiri sciureus</i>                                               | common squirrel<br>monkey | full length | NCBI accession: EF549698                                                       | full length        | NCBI accession: EF549700                                                       |
| <i>Catarrhini</i><br><i>Cercopithecoidea</i><br><i>Macaca mulatta</i> | rhesus monkey             | full length | <i>Macaca mulatta</i> trace archive:<br>gnl ti 402223230 and others            | full length        | NCBI <i>Macaca mulatta</i> trace archive:<br>gnl ti 486761772 and others       |
| <i>Papio hamadryas</i>                                                | hamadryas baboon          | full length | NCBI <i>Papio hamadryas</i> trace archive:<br>gnl ti 1943570175 and others     | full length        | NCBI <i>Papio hamadryas</i> trace archive:<br>gnl ti 1959076673 and others     |
| <i>Hominoidea</i><br><i>Hylobatidae</i><br><i>Nomascus leucogenys</i> | white-cheeked<br>Gibbon   | full length | NCBI <i>Nomascus leucogenys</i> trace<br>archive: gnl ti 1891571032 and others | full length<br>(P) | NCBI <i>Nomascus leucogenys</i> trace archive:<br>gnl ti 2088070237 and others |

|                        |            |             |                                                                              |                 |                                                                              |
|------------------------|------------|-------------|------------------------------------------------------------------------------|-----------------|------------------------------------------------------------------------------|
| <i>Hominidae</i>       |            |             |                                                                              |                 |                                                                              |
| <i>Homo sapiens</i>    | human      | full length | NCBI accession: NM_138327                                                    | full length (P) | NCBI accession: NG_004855                                                    |
| <i>Pan troglodytes</i> | chimpanzee | full length | NCBI accession: NM_001009145                                                 | full length (P) | NCBI accession: FJ372513, FJ372514, AY702310                                 |
| <i>Pongo pygmaeus</i>  | orangutan  | full length | NCBI <i>Pongo pygmaeus abelii</i> trace archive: gnl ti 820557702 and others | full length (P) | NCBI <i>Pongo pygmaeus abelii</i> trace archive: gnl ti 886956191 and others |

**Table S3. Detailed description of rat TA<sub>1</sub>-Taar4 chimeras generated in this study.**

| <b>chimera</b>                 | <b>rat TA<sub>1</sub></b>         | <b>rat Taar4</b>                     | <b>HA-tag</b> | <b>FLAG-tag</b> | <b>Rhod-tag</b> |
|--------------------------------|-----------------------------------|--------------------------------------|---------------|-----------------|-----------------|
| <b>C<sub>TM1-3</sub></b>       | 129-332                           | 2-139                                | +             | +               | -               |
| <b>C<sub>TM1-3R</sub></b>      | 129-332                           | 2-139                                | +             | +               | +               |
| <b>C<sub>TM4-7</sub></b>       | 2-128                             | 140-347                              | +             | +               | -               |
| <b>C<sub>TM4-7R</sub></b>      | 2-128                             | 140-347                              | +             | +               | +               |
| <b>C<sub>TM1</sub></b>         | 55-332                            | 2-65                                 | +             | +               | -               |
| <b>C<sub>TM1R</sub></b>        | 55-332                            | 2-65                                 | +             | +               | +               |
| <b>C<sub>TM2</sub></b>         | 2-54; 92-332                      | 66-102                               | +             | +               | -               |
| <b>C<sub>TM2R</sub></b>        | 2-54; 92-332                      | 66-102                               | +             | +               | +               |
| <b>C<sub>TM3</sub></b>         | 2-91; 129-332                     | 103-139                              | +             | +               | -               |
| <b>C<sub>TM3R</sub></b>        | 2-91; 129-332                     | 103-139                              | +             | +               | +               |
| <b>C<sub>TM4</sub></b>         | 2-134; 169-332                    | 146-179                              | +             | +               | -               |
| <b>C<sub>TM4R</sub></b>        | 2-134; 169-332                    | 146-179                              | +             | +               | +               |
| <b>C<sub>TM5</sub></b>         | 2-175; 217-332                    | 187-226                              | +             | +               | -               |
| <b>C<sub>TM5R</sub></b>        | 2-175; 217-332                    | 187-226                              | +             | +               | +               |
| <b>C<sub>TM6</sub></b>         | 2-235; 274-332                    | 248-285                              | +             | +               | -               |
| <b>C<sub>TM6R</sub></b>        | 2-235; 274-332                    | 248-285                              | +             | +               | +               |
| <b>C<sub>TM6i</sub></b>        | 2-235; 262-332                    | 248-273                              | +             | +               | -               |
| <b>C<sub>TM6iR</sub></b>       | 2-235; 262-332                    | 248-273                              | +             | +               | +               |
| <b>C<sub>TM6o</sub></b>        | 2-261; 274-332                    | 274-285                              | +             | +               | -               |
| <b>C<sub>TM6oR</sub></b>       | 2-261; 274-332                    | 274-285                              | +             | +               | +               |
| <b>C<sub>TM7</sub></b>         | 2-279                             | 292-347                              | +             | +               | -               |
| <b>CR<sub>TM7R</sub></b>       | 2-279                             | 292-347                              | +             | +               | +               |
| <b>C<sub>TM1/7</sub></b>       | 55-279                            | 2-65; 292-34                         | +             | +               | -               |
| <b>C<sub>TM1/7R</sub></b>      | 55-279                            | 2-65; 292-34                         | +             | +               | +               |
| <b>C<sub>TM2/3</sub></b>       | 2-54; 129-332                     | 66-139                               | +             | +               | -               |
| <b>C<sub>TM2/4</sub></b>       | 2-54; 92-134; 169-332             | 66-102; 146-179                      | +             | +               | -               |
| <b>C<sub>TM2/4R</sub></b>      | 2-54; 92-134; 169-332             | 66-102; 146-179                      | +             | +               | +               |
| <b>C<sub>TM2/5</sub></b>       | 2-54; 92-175; 217-332             | 66-102; 187-226                      | +             | +               | -               |
| <b>C<sub>TM2/5R</sub></b>      | 2-54; 92-175; 217-332             | 66-102; 187-226                      | +             | +               | +               |
| <b>C<sub>TM3/6</sub></b>       | 2-91; 129-235; 274-332            | 103-139; 248-285                     | +             | +               | -               |
| <b>C<sub>TM4/5</sub></b>       | 2-134; 169-175; 217-332           | 146-179; 187-226                     | +             | +               | -               |
| <b>C<sub>TM4/5R</sub></b>      | 2-134; 169-175; 217-332           | 146-179; 187-226                     | +             | +               | +               |
| <b>C<sub>TM2/4/5</sub></b>     | 2-54; 92-134; 169-175;<br>217-332 | 66-102; 146-179; 187-<br>226         | +             | +               | -               |
| <b>C<sub>TM2/4/5R</sub></b>    | 2-54; 92-134; 169-175;<br>217-332 | 66-102; 146-179; 187-<br>226         | +             | +               | +               |
| <b>C<sub>TM2/3/4/5</sub></b>   | 2-54; 217-332                     | 66-226                               | +             | +               | -               |
| <b>C<sub>TM2/4/5/6</sub></b>   | 2-54; 92-134; 169-175;<br>274-332 | 66-102; 146-179; 187-<br>285         | +             | +               | -               |
| <b>C<sub>TM1/2/4/5/7</sub></b> | 92-134; 169-175; 217-279          | 2-102; 146-179; 187-<br>226, 292-347 | +             | +               | -               |
| <b>C<sub>TM2-7</sub></b>       | 2-54                              | 66-347                               | +             | +               | -               |
| <b>C<sub>TM1-6</sub></b>       | 280-332                           | 2-291                                | +             | +               | -               |
| <b>C<sub>TM2-6</sub></b>       | 2-54; 280-332                     | 66-291                               | +             | +               | -               |

Various rat TA<sub>1</sub>-Taar4 chimeras were generated as described in *experimental procedures*. The construct designation and the exact constitution are outlined. Numbers given refer to the exact rat TA<sub>1</sub> and rat Taar4 amino acid position (without the epitope tags), respectively. + epitope tag present; -, no epitope tag; HA-tag: YPYDVPDYA; FLAG-tag: DYKDDDDK; RHOD-tag: NGTEGPNFYVPFSNKTGVVR

**Table S4. Structural comparison of TA<sub>1</sub> and Taar4 orthologs**

|             | % identity between<br>rat TA <sub>1</sub> and rat Taar4 | % identity among<br>27 mammalian TA <sub>1</sub> | % identity among<br>27 mammalian Taar4 |
|-------------|---------------------------------------------------------|--------------------------------------------------|----------------------------------------|
| full length | 46.8                                                    | 80.7                                             | 83.0                                   |
| N-term      | 20.0                                                    | 66.2                                             | 66.1                                   |
| TM1         | 40.0                                                    | 81.0                                             | 76.0                                   |
| IL1         | 83.3                                                    | 98.8                                             | 96.3                                   |
| TM2         | 66.7                                                    | 90.9                                             | 95.7                                   |
| EL1         | 83.3                                                    | 78.6                                             | 94.0                                   |
| TM3         | 63.6                                                    | 93.6                                             | 93.4                                   |
| IL2         | 54.5                                                    | 83.6                                             | 87.9                                   |
| TM4         | 47.8                                                    | 77.4                                             | 79.5                                   |
| EL2         | 35.7                                                    | 74.6                                             | 83.9                                   |
| TM5         | 42.3                                                    | 82.1                                             | 90.3                                   |
| IL3         | 23.3                                                    | 64.1                                             | 66.1                                   |
| TM6         | 59.4                                                    | 84.7                                             | 86.3                                   |
| EL3         | 50.0                                                    | 73.7                                             | 82.8                                   |
| TM7         | 42.3                                                    | 84.3                                             | 90.1                                   |
| C-term      | 51.5                                                    | 78.0                                             | 79.8                                   |

Protein sequence of rat TA<sub>1</sub> und rat Taar4 were compared for all domains. The sequence information of 27 full-length mammalian TA<sub>1</sub> and Taar4 orthologs (see suppl. Figure S1) was used to determine the structural conservation of the respective receptor (given as % identity determined by pairwise comparison using MegAlign).

**Table S5. Functional characterization of rat TA<sub>1</sub>, rat Taar4 and chimeras in HEK-293 cells using a cAMP accumulation assay.**

|                          | Basal<br>cAMP | β-PEA<br>E <sub>max</sub> | Tyr<br>E <sub>max</sub> | Trp<br>E <sub>max</sub> | (+) Pseph<br>E <sub>max</sub> | (-) Eph<br>E <sub>max</sub> | (+) MAmp<br>E <sub>max</sub> | MDMA<br>E <sub>max</sub> | LSD<br>E <sub>max</sub> | Naph<br>E <sub>max</sub> | Xylo<br>E <sub>max</sub> | Oxy<br>E <sub>max</sub> | Tram<br>E <sub>max</sub> | Neo-Syn<br>E <sub>max</sub> | Amio<br>E <sub>max</sub> | Betahis<br>E <sub>max</sub> |
|--------------------------|---------------|---------------------------|-------------------------|-------------------------|-------------------------------|-----------------------------|------------------------------|--------------------------|-------------------------|--------------------------|--------------------------|-------------------------|--------------------------|-----------------------------|--------------------------|-----------------------------|
| R1                       | 2.3 ± 0.5 (5) | 22.2 ± 7.3 (5)            | 24.6 ± 6.5 (3)          | 17.9 ± 5.8 (3)          | 3.2 ± 0.3 (3)                 | 3.0 ± 0.5 (5)               | 10.4 ± 1.7 (5)               | 9.0 ± 1.5 (5)            | 3.7 ± 0.9 (5)           | 11.0 ± 2.5 (5)           | 8.2 ± 1.7 (5)            | 4.9 ± 1.2 (5)           | 11.7 ± 4.3 (5)           | 5.4 ± 1.1 (5)               | 2.8 ± 0.5 (3)            | 12.8 ± 1.6 (3)              |
| R1-R                     | 7.1 ± 1.4 (5) | 55.9 ± 15.3 (5)           | 70.8 ± 29.4 (3)         | 57.7 ± 23.2 (3)         | 10.5 ± 3.6 (3)                | 13.4 ± 3.8 (5)              | 40.8 ± 12.3 (5)              | 35.1 ± 8.5 (5)           | 19.8 ± 4.9 (5)          | 44.1 ± 14.4 (5)          | 28.4 ± 6.1 (5)           | 23.2 ± 7.9 (5)          | 34.4 ± 12.7 (5)          | 18.6 ± 4.5 (5)              | 11.6 ± 2.2 (3)           | 55.8 ± 12.6 (3)             |
| R4                       | 0.9 ± 0.4 (4) | 1.2 ± 0.2 (4)             | 1.2 ± 0.3 (3)           | 1.2 ± 0.3 (3)           | 0.7 ± 0.2 (3)                 | 1.0 ± 0.3 (4)               | 0.8 ± 0.4 (4)                | 0.7 ± 0.3 (4)            | 1.1 ± 0.3 (4)           | 1.1 ± 0.3 (4)            | 0.8 ± 0.3 (4)            | 0.9 ± 0.4 (4)           | 0.6 ± 0.3 (4)            | 0.8 ± 0.3 (4)               | 1.5 ± 0.3 (3)            | 0.9 ± 0.4 (3)               |
| R4R                      | 1.2 ± 0.3 (4) | 1.5 ± 0.4 (4)             | 1.6 ± 0.4 (3)           | 1.9 ± 0.6 (3)           | 0.9 ± 0.3 (3)                 | 1.0 ± 0.3 (4)               | 1.1 ± 0.4 (4)                | 1.2 ± 0.5 (4)            | 1.4 ± 0.6 (4)           | 1.4 ± 0.5 (4)            | 1.3 ± 0.5 (4)            | 1.0 ± 0.4 (4)           | 1.2 ± 0.3 (4)            | 1.0 ± 0.3 (4)               | 2.5 ± 1.1 (3)            | 1.8 ± 0.1 (3)               |
| C <sub>TM1-3</sub>       | 1.2 ± 0.2 (3) | 1.5 ± 0.3 (3)             | 1.7 ± 0.3 (3)           | 1.5 ± 0.3 (3)           | 1.6 ± 0.5 (3)                 | 2.0 ± 0.7 (3)               | 1.5 ± 0.3 (3)                | 1.5 ± 0.4 (3)            | 1.5 ± 0.3 (3)           | 1.9 ± 0.5 (3)            | 1.4 ± 0.2 (3)            | 1.9 ± 0.3 (3)           | 1.7 ± 0.5 (3)            | 1.5 ± 0.2 (3)               | 2.0 ± 0.1 (3)            | 1.6 ± 0.2 (3)               |
| C <sub>TM4-7</sub>       | 1.0 ± 0.1 (3) | 0.7 ± 0.3 (3)             | 0.8 ± 0.3 (3)           | 0.7 ± 0.1 (3)           | 1.2 ± 0.6 (3)                 | 1.1 ± 0.3 (3)               | 1.3 ± 0.6 (3)                | 0.7 ± 0.2 (3)            | 1.0 ± 0.4 (3)           | 1.1 ± 0.5 (3)            | 0.9 ± 0.3 (3)            | 0.9 ± 0.2 (3)           | 0.9 ± 0.3 (3)            | 0.6 ± 0.4 (3)               | 1.0 ± 0.3 (3)            | 0.8 ± 0.3 (3)               |
| C <sub>TM1</sub>         | 0.9 ± 0.1 (3) | 0.8 ± 0.1 (3)             | 0.9 ± 0.3 (3)           | 0.9 ± 0.1 (3)           | 0.8 ± 0.1 (3)                 | 1.0 ± 0.2 (3)               | 0.8 ± 0.1 (3)                | 0.6 ± 0.1 (3)            | 0.7 ± 0.1 (3)           | 0.8 ± 0.1 (3)            | 0.8 ± 0.1 (3)            | 0.9 ± 0.2 (3)           | 0.7 ± 0.1 (3)            | 0.6 ± 0.1 (3)               | 2.6 ± 0.2 (3)            | 1.8 ± 0.1 (3)               |
| C <sub>TM2</sub>         | 3.3 ± 0.5 (4) | 31.2 ± 6.1 (4)            | 37.5 ± 7.4 (3)          | 33.4 ± 5.4 (3)          | 6.3 ± 1.0 (3)                 | 7.5 ± 0.9 (4)               | 28.1 ± 4.9 (4)               | 19.9 ± 0.8 (4)           | 8.7 ± 0.7 (4)           | 22.7 ± 5.6 (4)           | 14.8 ± 3.7 (4)           | 11.1 ± 4.6 (4)          | 18.4 ± 4.5 (4)           | 8.1 ± 2.0 (4)               | 4.7 ± 0.3 (3)            | 24.4 ± 5.5 (3)              |
| C <sub>TM3</sub>         | 0.8 ± 0.3 (3) | 0.9 ± 0.4 (3)             | 0.6 ± 0.2 (3)           | 0.9 ± 0.4 (3)           | 0.8 ± 0.3 (3)                 | 0.7 ± 0.3 (3)               | 0.8 ± 0.4 (3)                | 0.7 ± 0.3 (3)            | 0.9 ± 0.4 (3)           | 1.0 ± 0.3 (3)            | 0.8 ± 0.3 (3)            | 0.5 ± 0.2 (3)           | 0.6 ± 0.2 (3)            | 1.0 ± 0.5 (3)               | 1.1 ± 0.4 (3)            | 1.0 ± 0.3 (3)               |
| C <sub>TM4</sub>         | 2.0 ± 0.7 (3) | 42.9 ± 3.3 (3)            | 57.6 ± 16.4 (3)         | 38.9 ± 6.9 (3)          | 7.4 ± 0.5 (3)                 | 6.8 ± 0.6 (3)               | 27.5 ± 1.3 (3)               | 20.6 ± 1.9 (3)           | 6.0 ± 0.6 (3)           | 23.2 ± 4.5 (3)           | 15.2 ± 2.1 (3)           | 12.9 ± 3.4 (3)          | 26.3 ± 5.8 (3)           | 10.9 ± 2.3 (3)              | 4.2 ± 0.8 (3)            | 23.7 ± 4.6 (3)              |
| C <sub>TM5</sub>         | 2.3 ± 0.5 (4) | 28.1 ± 6.4 (4)            | 29.4 ± 4.8 (3)          | 25.4 ± 5.2 (3)          | 7.1 ± 1.6 (3)                 | 10.6 ± 1.4 (4)              | 28.3 ± 6.1 (4)               | 16.9 ± 1.8 (4)           | 5.5 ± 1.2 (4)           | 22.1 ± 5.9 (4)           | 15.9 ± 3.8 (4)           | 5.8 ± 1.9 (4)           | 8.6 ± 1.7 (4)            | 5.2 ± 1.1 (4)               | 3.2 ± 1.6 (3)            | 28.4 ± 6.1 (3)              |
| C <sub>TM6</sub>         | 1.0 ± 0.6 (3) | 0.7 ± 0.3 (3)             | 0.7 ± 0.4 (3)           | 0.7 ± 0.3 (3)           | 1.5 ± 0.3 (3)                 | 1.1 ± 0.2 (3)               | 0.9 ± 0.4 (3)                | 0.6 ± 0.3 (3)            | 0.5 ± 0.3 (3)           | 0.7 ± 0.3 (3)            | 0.7 ± 0.1 (3)            | 1.1 ± 0.2 (3)           | 0.9 ± 0.1 (3)            | 0.6 ± 0.3 (3)               | 1.0 ± 0.4 (3)            | 0.8 ± 0.3 (3)               |
| C <sub>TM6i</sub>        | 1.1 ± 0.6 (3) | 3.1 ± 0.8 (3)             | 3.1 ± 0.5 (3)           | 2.7 ± 0.6 (3)           | 1.4 ± 0.4 (3)                 | 1.2 ± 0.3 (3)               | 2.5 ± 0.9 (3)                | 2.5 ± 1.0 (3)            | 1.1 ± 0.3 (3)           | 4.4 ± 0.6 (3)            | 2.7 ± 0.5 (3)            | 2.0 ± 0.5 (3)           | 1.9 ± 0.1 (3)            | 0.8 ± 0.1 (3)               | 2.0 ± 0.9 (3)            | 1.7 ± 0.6 (3)               |
| C <sub>TM6o</sub>        | 0.8 ± 0.2 (3) | 1.6 ± 0.5 (3)             | 2.7 ± 0.7 (3)           | 2.0 ± 0.9 (3)           | 0.8 ± 0.2 (3)                 | 1.3 ± 0.1 (3)               | 0.8 ± 0.3 (3)                | 0.9 ± 0.3 (3)            | 0.8 ± 0.3 (3)           | 2.3 ± 0.6 (3)            | 1.6 ± 0.3 (3)            | 1.2 ± 0.5 (3)           | 1.0 ± 0.2 (3)            | 1.1 ± 0.2 (3)               | 1.1 ± 0.4 (3)            | 0.7 ± 0.3 (3)               |
| C <sub>TM7</sub>         | 1.3 ± 0.1 (3) | 5.2 ± 0.2 (3)             | 5.1 ± 0.4 (3)           | 5.2 ± 0.4 (3)           | 1.3 ± 0.4 (3)                 | 2.1 ± 0.9 (3)               | 1.5 ± 0.3 (3)                | 2.1 ± 0.6 (3)            | 3.2 ± 0.5 (3)           | 4.5 ± 0.5 (3)            | 4.3 ± 0.8 (3)            | 2.5 ± 0.8 (3)           | 6.0 ± 0.8 (3)            | 1.2 ± 0.4 (3)               | 1.2 ± 0.1 (3)            | 0.8 ± 0.1 (3)               |
| C <sub>TM1/7</sub>       | 1.1 ± 0.1 (3) | 2.5 ± 0.8 (3)             | 3.1 ± 0.9 (3)           | 3.1 ± 0.6 (3)           | 1.4 ± 0.3 (4)                 | 1.1 ± 0.2 (3)               | 1.4 ± 0.2 (3)                | 0.8 ± 0.1 (3)            | 1.6 ± 0.4 (3)           | 2.8 ± 0.6 (3)            | 2.3 ± 0.6 (3)            | 1.5 ± 0.5 (3)           | 3.0 ± 0.7 (3)            | 1.5 ± 0.4 (3)               | 1.1 ± 0.1 (3)            | 0.9 ± 0.1 (3)               |
| C <sub>TM2/3</sub>       | 0.9 ± 0.4 (3) | 0.9 ± 0.3 (3)             | 0.9 ± 0.4 (3)           | 1.2 ± 0.4 (3)           | 1.0 ± 0.6 (3)                 | 1.1 ± 0.3 (3)               | 1.1 ± 0.3 (3)                | 1.0 ± 0.5 (3)            | 1.0 ± 0.3 (3)           | 1.4 ± 0.7 (3)            | 1.0 ± 0.1 (3)            | 1.1 ± 0.3 (3)           | 1.2 ± 0.5 (3)            | 1.1 ± 0.5 (3)               | 0.9 ± 0.2 (3)            | 1.0 ± 0.4 (3)               |
| C <sub>TM2/4</sub>       | 2.5 ± 0.5 (5) | 38.8 ± 4.2 (5)            | 43.2 ± 15.6 (3)         | 34.9 ± 9.5 (3)          | 12.6 ± 5.8 (3)                | 8.2 ± 1.7 (5)               | 30.9 ± 4.9 (5)               | 24.7 ± 2.9 (5)           | 6.0 ± 1.4 (5)           | 26.6 ± 5.8 (5)           | 24.2 ± 4.2 (5)           | 18.4 ± 5.0 (5)          | 21.6 ± 3.2 (5)           | 9.5 ± 2.4 (5)               | 2.2 ± 0.3 (3)            | 22.0 ± 4.6 (3)              |
| C <sub>TM2/5</sub>       | 2.7 ± 0.5 (5) | 45.2 ± 8.1 (5)            | 33.3 ± 8.6 (3)          | 37.2 ± 7.8 (3)          | 11.7 ± 2.0 (3)                | 15.7 ± 3.5 (5)              | 42.8 ± 5.2 (5)               | 35.5 ± 4.1 (5)           | 7.9 ± 1.5 (5)           | 31.8 ± 3.6 (5)           | 32.9 ± 5.4 (5)           | 12.2 ± 2.9 (5)          | 11.2 ± 1.3 (5)           | 11.3 ± 1.7 (5)              | 3.1 ± 0.4 (3)            | 26.4 ± 2.3 (3)              |
| C <sub>TM3/6</sub>       | 1.2 ± 0.4 (3) | 0.8 ± 0.3 (3)             | 0.7 ± 0.2 (3)           | 1.3 ± 0.4 (3)           | 0.9 ± 0.1 (3)                 | 1.1 ± 0.4 (3)               | 1.2 ± 0.2 (3)                | 0.8 ± 0.2 (3)            | 1.0 ± 0.3 (3)           | 1.0 ± 0.2 (3)            | 0.8 ± 0.1 (3)            | 0.9 ± 0.3 (3)           | 0.9 ± 0.1 (3)            | 1.0 ± 0.2 (3)               | 1.4 ± 0.3 (3)            | 1.0 ± 0.3 (3)               |
| C <sub>TM4/5</sub>       | 2.0 ± 0.5 (5) | 41.2 ± 9.1 (5)            | 18.4 ± 2.7 (3)          | 26.7 ± 5.1 (3)          | 6.2 ± 2.2 (3)                 | 8.9 ± 2.7 (5)               | 47.4 ± 11.4 (5)              | 26.2 ± 7.4 (5)           | 7.4 ± 2.1 (5)           | 30.0 ± 7.3 (5)           | 30.1 ± 9.0 (5)           | 16.1 ± 5.1 (5)          | 13.8 ± 2.7 (5)           | 7.3 ± 0.9 (5)               | 2.1 ± 0.5 (3)            | 23.5 ± 6.8 (3)              |
| C <sub>TM2/4/5</sub>     | 1.6 ± 0.4 (5) | 50.0 ± 12.0 (5)           | 12.8 ± 2.4 (3)          | 43.3 ± 3.7 (3)          | 2.4 ± 0.8 (3)                 | 2.8 ± 0.5 (5)               | 50.9 ± 12.1 (5)              | 29.1 ± 7.3 (5)           | 5.2 ± 1.7 (5)           | 47.6 ± 13.1 (5)          | 40.7 ± 10.2 (5)          | 32.2 ± 11.4 (5)         | 10.3 ± 1.5 (5)           | 5.0 ± 1.0 (5)               | 1.9 ± 0.2 (3)            | 4.4 ± 1.2 (3)               |
| C <sub>TM2/3/4/5</sub>   | 0.4 ± 0.1 (3) | 0.3 ± 0.1 (3)             | 0.4 ± 0.2 (3)           | 0.3 ± 0.1 (3)           | 0.5 ± 0.1 (3)                 | 0.6 ± 0.3 (3)               | 0.4 ± 0.1 (3)                | 0.3 ± 0.1 (3)            | 0.9 ± 0.6 (3)           | 0.6 ± 0.2 (3)            | 0.4 ± 0.2 (3)            | 0.3 ± 0.1 (3)           | 0.2 ± 0.1 (3)            | 0.8 ± 0.5 (3)               | 0.5 ± 0.1 (3)            | 0.3 ± 0.2 (3)               |
| C <sub>TM2/4/5/6</sub>   | 0.7 ± 0.2 (3) | 0.6 ± 0.1 (3)             | 0.6 ± 0.2 (3)           | 0.8 ± 0.1 (3)           | 0.6 ± 0.2 (3)                 | 0.8 ± 0.1 (3)               | 0.7 ± 0.2 (3)                | 0.5 ± 0.1 (3)            | 0.7 ± 0.4 (3)           | 0.7 ± 0.3 (3)            | 0.5 ± 0.1 (3)            | 0.7 ± 0.2 (3)           | 0.9 ± 0.3 (3)            | 0.7 ± 0.3 (3)               | 0.9 ± 0.2 (3)            | 0.9 ± 0.1 (3)               |
| C <sub>TM1/2/4/5/7</sub> | 2.4 ± 0.1 (3) | 3.4 ± 0.5 (3)             | 1.9 ± 0.6 (3)           | 4.2 ± 0.7 (3)           | 2.9 ± 1.3 (3)                 | 4.4 ± 1.5 (3)               | 2.4 ± 0.5 (3)                | 1.9 ± 0.6 (3)            | 3.3 ± 1.1 (3)           | 9.6 ± 2.7 (3)            | 25.3 ± 6.4 (3)           | 11.6 ± 2.3 (3)          | 13.9 ± 2.1 (3)           | 2.3 ± 0.8 (3)               | 4.2 ± 1.5 (3)            | 3.0 ± 1.3 (3)               |
| C <sub>TM2-7</sub>       | 0.6 ± 0.1 (3) | 1.2 ± 0.1 (3)             | 1.2 ± 0.2 (3)           | 1.0 ± 0.2 (3)           | 0.9 ± 0.2 (3)                 | 1.2 ± 0.3 (3)               | 1.2 ± 0.2 (3)                | 0.9 ± 0.1 (3)            | 1.3 ± 0.2 (3)           | 1.4 ± 0.2 (3)            | 1.6 ± 0.1 (3)            | 1.3 ± 0.2 (3)           | 0.9 ± 0.1 (3)            | 1.1 ± 0.1 (3)               | 1.3 ± 0.1 (3)            | 1.3 ± 0.2 (3)               |
| C <sub>TM1-6</sub>       | 1.3 ± 0.5 (3) | 1.1 ± 0.5 (3)             | 1.2 ± 0.5 (3)           | 0.7 ± 0.3 (3)           | 1.2 ± 0.2 (3)                 | 1.3 ± 0.6 (3)               | 1.1 ± 0.4 (3)                | 1.0 ± 0.4 (3)            | 1.3 ± 0.4 (3)           | 1.3 ± 0.4 (3)            | 1.2 ± 0.4 (3)            | 1.1 ± 0.4 (3)           | 1.1 ± 0.5 (3)            | 0.8 ± 0.1 (3)               | 1.3 ± 0.3 (3)            | 0.8 ± 0.2 (3)               |
| C <sub>TM2-6</sub>       | 1.4 ± 0.3 (3) | 1.3 ± 0.3 (3)             | 1.0 ± 0.4 (3)           | 1.4 ± 0.5 (3)           | 1.0 ± 0.3 (3)                 | 1.4 ± 0.4 (3)               | 1.7 ± 0.5 (3)                | 1.2 ± 0.3 (3)            | 1.1 ± 0.4 (3)           | 1.6 ± 0.7 (3)            | 1.3 ± 0.6 (3)            | 1.7 ± 0.6 (3)           | 1.1 ± 0.4 (3)            | 1.1 ± 0.2 (3)               | 1.3 ± 0.4 (3)            | 1.3 ± 0.7 (3)               |
